# Supplementary material for: Decreased DNA Damage and Improved p53 Specificity of RITA Analogs
Source: Oxford University Press journal article supplement (doi:10.1158/1535-7163.mct-22-0119), 2022-07-25
Supplement: mct-22-0119_supplementary_table_1_suppst1.xlsx [file mct-22-0119_supplementary_table_1_suppst1.xlsx]

## Sheet: Sheet1
qRT-PCR primers
MCL-1	F	TGGCTAAACACTTGAAGACC
	R	GTCCTCTACATGGAAGAACTC
BCL-2	F	GCCTTCTTTGAGTTCGGT
	R	AGTTCCACAAAGGCATCC
MYC	F	CAGCTGCTTAGACGCTGGATT
	R	GTAGAAATACGGCTGCACCGA
IGF-1R	F	CCATTCTCATGCCTTGGTCT
	R	TGCAAGTTCTGGTTGTCGAG
MDM2	F	CCCTAGCAATTTAGACAACCTGA
	R	TTCCACTACCAAAGTAGGTCAATTA
NOXA (PMAIP1)	F	AAGTGCAAGTAGCTGGAAG
	R	TGTCTCCAAATCTCCTGAGT
p21 (CDKN1A)	F	CTGTCACTGTCTTGTACCC
	R	AGTGGTAGAAATCTGTCATGC
PUMA (BBC3)	F	GACGACCTCAACGCACAGTA
	R	CACCTAATTGGGCTCCATCT
RPL13A	F	CCTGGAGGAGAAGAGGAAAGAGA
	R	TTGAGGACCTCTGTGTATTTGTCAA
RPLPO	F	TGGTCATCCAGCAGGTGTTCCA
	R	ACAGACACTGGCAACATTGCGG
Oligos for shRNA	sequence (5'-3')
shp53#1 pSuper	GACTCCAGTGGTAATCTAC
shp53#2	CCGGCACCATCCACTACAACTACATCTCGAGATGTAGTTGTAGTGGATGGTGTTTTT
scramble shRNA	CCTAAGGTTAAGTCGCCCTCG
shGFP	CAAGCTGACCCTGAAGTTCAT
